# Supplementary material for: Proximity hybridization based “turn-on” DNA tweezers for accurate and enzyme-free small extracellular vesicle analysis
Source: Royal Society of Chemistry journal article supplement (doi:10.1039/d4ay00487f), 2024-01-01
Supplement: d4ay00487f1.pdf [file d4ay00487f1.pdf]

## Supplementary material

### Supplemented experimental section

#### *Assembly of DNA tweezer:*

The DNA tweezer structure was firstly formed by mixing of sequence (i–iv) with a molar ratio of 1:1. Then, the mixture was heated up to 95 °C and slowly cooled down to room temperature.

#### *Assembly of HP:*

The mixture containing 20 µL HP (10 µM) was heated up to 95 °C and slowly cooled down to room temperature.

#### *Determination of the extracted sEVs concentrations:*

Nanoparticle tracking analysis (NTA) were performed to determine the concentration of sEVs by NTA, which was performed using the Nanosight NS300 followed by protocol according to former references <sup>1,2</sup>.

#### *Experimental parameters optimization:*

The sEVs were incubated for 40 min in 200 µL of PBS buffer with 0.5 µM C2 probe and 1 µM C1 probe, respectively. Following that, a hairpin (150 nM) and DNA tweezers (200 nM) were added to the mixture in 10 mM PBS (pH 7.4) containing 0.5 M NaCl. Following a three-hour incubation under different experimental temperatures, the sample was analyzed using a fluorescence spectrometer. Other experimental parameters optimization follows the former procedures.

**Table S1.** The sequences of used oligonucleotides in this work

| Title | Sequences (5' to 3')                           |
|-------|------------------------------------------------|
| C1    | AGC TCG GTA GAC TCA GGA TTT TTT TTT            |
| C1    | Cholesterol-TTT TTT TTT TCC TGA GTC TAC GTA GC |
| HP    | CGG TAG CCT GTG CTA CCG AGC T                  |
| ii    | GTT GGA GCG ACA TTA GAG AGC TAC AA-FAM         |
| iii   | DABCYL-GTA GCC TCC TGT CCT ATC TAT GAT GG      |
| i     | CTA ATG TCG CTC CAA CAA CCA TCA TAG ATA GGA C  |
| iv    | TTG TAG CAC AGG CTA CCG                        |

**Table S2.** A brief comparison of the proposed method with former ones

| <b>Title</b>           | <b>Mechanism</b>                   | <b>Target molecule(s)</b> | <b>Low limit of detection (particles/<math>\mu</math>L)</b> | <b>Enzymes</b>                                  | <b>Advantages and disadvantages</b>                                                                                                                                                                 | <b>Ref</b>   |
|------------------------|------------------------------------|---------------------------|-------------------------------------------------------------|-------------------------------------------------|-----------------------------------------------------------------------------------------------------------------------------------------------------------------------------------------------------|--------------|
| The method             | Proximity ligation+ DNA tweezer    | CD63 and lipid bilayer    | 57                                                          | No                                              | Advantages: high stability and anti-interference capability to free CD63 protein or cell lysis; high sensitivity; no enzymes were used.<br>Disadvantages: could only be applied for sEVs detection. |              |
| AcmPLA                 | Proximity ligation assisted RCA    | CD63 and lipid bilayer    | $10^3$                                                      | T4 DNA ligase, phi29 polymerase, antibody,      | Advantages: high stability and anti-interference capability to free CD63 protein or cell lysis;<br>Disadvantages: five probes and two enzymes were used in this method; low sensitivity             | <sup>1</sup> |
| AID-Cas                | CRISPR-Cas12a assisted dual cycles | CD63 protein              | $10^2$                                                      | Cas12a, polymerase, Nt.BbvCI, T7 RNA polymerase | Advantages: high sensitivity; Disadvantages: low anti-interference capability to free CD63 protein                                                                                                  | <sup>2</sup> |
| Allosteric probe based | SDA                                | CD63 protein              | $10^2$                                                      | DNA polymerase, endonuclease                    | Advantages: high sensitivity; Disadvantages: low anti-interference capability to free CD63 protein                                                                                                  | <sup>3</sup> |

RCA, rolling circle amplification; SDA, strand displacement amplification; AcmPLA, aptamer–cholesterol-mediated proximity ligation assay; AID-Cas, allosteric probe-initiated dual cycle amplification-assisted CRISPR-Cas12a.

## References:

1. X. Zhao, C. Luo, Q. Mei, H. Zhang, W. Zhang, D. Su, W. Fu and Y. Luo, *Anal. Chem.*, 2020, **92**, 5411-5418.
2. X. Zhao, L. Zeng, Q. Mei and Y. Luo, *ACS Sens*, 2020, **5**, 2239-2246.
3. Y. Zhou, F. Yu, H. Cheng and L. Ning, *ACS Omega*, 2021, **6**, 17776-17781.
